# Supplementary material for: Chemoprofiling as Breeding Tool for Pharmaceutical Use of Salix
Source: PubMed Central journal article supplement (PMC8047421; doi:10.3389/fpls.2021.579820), 2021-04-01
Supplement: Data_Sheet_1.pdf [file Data_Sheet_1.pdf]

# SUPPORTING INFORMATION

## Chemoprofiling as breeding tool for pharmaceutical use of *Salix*

Nadja Förster<sup>1\*</sup>, Kyriaki Antoniadou<sup>2</sup>, Matthias Zander<sup>1</sup>, Sebastian Baur<sup>2</sup>, Verena Karolin Mittermeier-Kleßinger<sup>2</sup>, Corinna Dawid<sup>2,3</sup>, Christian Ulrichs<sup>1</sup>, Inga Mewis<sup>1</sup>

<sup>1</sup>Division Urban Plant Ecophysiology, Humboldt-Universität zu Berlin, Berlin, Germany

<sup>2</sup>Chair of Food Chemistry and Molecular Sensory Science, Technical University of Munich, Freising, Germany

<sup>3</sup>Bavarian Center for Biomolecular Mass Spectrometry, Technical University of Munich, Freising, Germany

## Supp. Table: Origin of *Salix* species and crosses

| Species                                                                            | Abbreviation    | Cultivation | Origin                                                   |
|------------------------------------------------------------------------------------|-----------------|-------------|----------------------------------------------------------|
| <i>S. viminalis</i>                                                                | V11             | ZP          | chance seedling Waldsiedersdorf 2011, G                  |
| <i>S. daphnoides</i>                                                               | DA1             | DA          | G, Mecklenburg-Vorpommern, Pampow                        |
| <i>S. viminalis</i> x <i>S. daphnoides</i>                                         | V11xDA1_1       | DA          | new cross HU Berlin 2014, G                              |
| <i>S. viminalis</i> x <i>S. daphnoides</i>                                         | V11xDA1_2       | DA          | new cross HU Berlin 2014, G                              |
| <i>S. viminalis</i> x <i>S. daphnoides</i>                                         | V11xDA1_3       | DA          | new cross HU Berlin 2014, G                              |
| <i>S. viminalis</i> x <i>S. daphnoides</i>                                         | V11xDA1_4       | DA          | new cross HU Berlin 2014, G                              |
| <i>S. viminalis</i> x <i>S. daphnoides</i>                                         | V11xDA1_5       | DA          | new cross HU Berlin 2014, G                              |
| <i>S. viminalis</i> x <i>S. daphnoides</i>                                         | V11xDA1_6       | DA          | new cross HU Berlin 2014, G                              |
| <i>S. viminalis</i> x <i>S. daphnoides</i>                                         | V11xDA1_7       | DA          | new cross HU Berlin 2014, G                              |
| <i>S. viminalis</i> x <i>S. daphnoides</i>                                         | V11xDA1_8       | DA          | new cross HU Berlin 2014, G                              |
| <i>S. viminalis</i> x <i>S. daphnoides</i>                                         | V11xDA1_9       | DA          | new cross HU Berlin 2014, G                              |
| <i>S. viminalis</i>                                                                | VI2             | Wriezen     | Swedish clone, 'Jorr', sold by Lantmännen Agroenergie AB |
| <i>S. daphnoides</i>                                                               | DA2xDA3         | ZP          | new cross HU Berlin 2011, G                              |
| <i>S. daphnoides</i> x <i>S. viminalis</i>                                         | (DA2xDA3)xVI2_1 | DA          | new cross HU Berlin 2014, G                              |
| <i>S. daphnoides</i> x <i>S. viminalis</i>                                         | (DA2xDA3)xVI2_2 | DA          | new cross HU Berlin 2014, G                              |
| <i>S. daphnoides</i> x <i>S. viminalis</i>                                         | (DA2xDA3)xVI2_3 | DA          | new cross HU Berlin 2014, G                              |
| <i>S. daphnoides</i> x <i>S. viminalis</i>                                         | (DA2xDA3)xVI2_4 | DA          | new cross HU Berlin 2014, G                              |
| <i>S. daphnoides</i> x <i>S. viminalis</i>                                         | (DA2xDA3)xVI2_5 | DA          | new cross HU Berlin 2014, G                              |
| <i>S. humboldtiana</i> x <i>S. purpurea</i>                                        | HU1xPU1         | ZP          | new cross Waldsiedersdorf 2011, G                        |
| <i>S. daphnoides</i>                                                               | DA4             | DA          | G, Mecklenburg-Vorpommern, Zarrendorf                    |
| ( <i>S. humboldtiana</i> x <i>S. purpurea</i> ) x <i>S. daphnoides</i>             | (HU1xPU1)xDA4_1 | DA          | new cross HU Berlin 2014, G                              |
| ( <i>S. humboldtiana</i> x <i>S. purpurea</i> ) x <i>S. daphnoides</i>             | (HU1xPU1)xDA4_2 | DA          | new cross HU Berlin 2014, G                              |
| ( <i>S. humboldtiana</i> x <i>S. purpurea</i> ) x <i>S. daphnoides</i>             | (HU1xPU1)xDA4_3 | DA          | new cross HU Berlin 2014, G                              |
| <i>S. viminalis</i> ( <i>schwerinii</i> x <i>viminalis</i> )                       | VI3_h           | WS          | Swedish clone 'Olof', sold by Lantmännen Agroenergie AB  |
| <i>S. viminalis</i>                                                                | VI4             | DA          | Swedish clone '79036' breeding company Svalöf-Weibull AB |
| <i>S. viminalis</i> x <i>S. viminalis</i> ( <i>schwerinii</i> x <i>viminalis</i> ) | VI4xVI3_1       | ZP          | new cross Waldsiedersdorf 2012, G                        |
| <i>S. viminalis</i> x <i>S. viminalis</i> ( <i>schwerinii</i> x <i>viminalis</i> ) | VI4xVI3_2       | ZP          | new cross Waldsiedersdorf 2012, G                        |
| <i>S. alba</i> x <i>S. fragilis</i> ( <i>S. x rubens</i> )                         | AL1_h           | ZP          | Hungary, Baja, 'B38', University of Sopron               |
| <i>S. alba</i>                                                                     | AL2             | ZP          | G, Thüringen, Erfurt, Höngeda                            |
| <i>S. alba</i> x <i>S. alba</i> x <i>S. x rubens</i>                               | AL2xAL1_1       | DA          | new cross Waldsiedersdorf 2014, G                        |
| <i>S. alba</i> x <i>S. alba</i> x <i>S. x rubens</i>                               | AL2xAL1_2       | DA          | new cross Waldsiedersdorf 2014, G                        |
| <i>S. pentandra</i>                                                                | PE1             | DA          | G, Brandenburg, Eggersdorf                               |
| <i>S. alba</i> x <i>S. pentandra</i>                                               | AL2xPE1_1       | DA          | new cross Waldsiedersdorf 2014, G                        |
| <i>S. alba</i> x <i>S. pentandra</i>                                               | AL2xPE1_2       | DA          | new cross Waldsiedersdorf 2014, G                        |
| <i>S. alba</i>                                                                     | AL3             | ZP          | G, Brandenburg, Waldsiedersdorf                          |
| <i>S. alba</i>                                                                     | AL4             | ZP          | Romania, Bukarest, Institutul de Cercetări Forestiere    |
| <i>S. alba</i> x <i>S. alba</i>                                                    | AL3xAL4_1       | DA          | new cross Waldsiedersdorf 2014, G                        |
| <i>S. alba</i> x <i>S. alba</i>                                                    | AL3xAL4_2       | DA          | new cross Waldsiedersdorf 2014, G                        |
| <i>S. viminalis</i>                                                                | VI5             | DA          | English clone, 'Bowles', UK National Willows Collection  |
| <i>S. viminalis</i> x <i>S. viminalis</i>                                          | VI5xVI2_1       | DA          | new cross Waldsiedersdorf 2011, G                        |
| <i>S. viminalis</i> x <i>S. viminalis</i>                                          | VI5xVI2_2       | DA          | new cross Waldsiedersdorf 2011, G                        |
| <i>S. viminalis</i> x <i>S. viminalis</i>                                          | VI5xVI2_3       | DA          | new cross Waldsiedersdorf 2011, G                        |
| <i>S. viminalis</i> x <i>S. viminalis</i>                                          | VI5xVI2_4       | DA          | new cross Waldsiedersdorf 2011, G                        |
| <i>S. daphnoides</i>                                                               | DA3             | DA          | G, Baden-Württemberg, Laimnau Argen                      |
| <i>S. daphnoides</i>                                                               | DA2             | DA          | Poland, Westpommern, Miedzyzdroje                        |

|                                                                                   |           |        |                                                                                      |
|-----------------------------------------------------------------------------------|-----------|--------|--------------------------------------------------------------------------------------|
| <i>S. daphnoides</i>                                                              | DA2xDA3_1 | DA     | new cross HU Berlin 2011, G                                                          |
| <i>S. daphnoides</i>                                                              | DA2xDA3_2 | DA     | new cross HU Berlin 2011, G                                                          |
| <i>S. daphnoides</i>                                                              | DA2xDA3_3 | DA     | new cross HU Berlin 2011, G                                                          |
| <i>S. daphnoides</i>                                                              | DA2xDA3_4 | DA     | new cross HU Berlin 2011, G                                                          |
| <i>S. daphnoides</i>                                                              | DA2xDA3_5 | DA     | new cross HU Berlin 2011, G                                                          |
| <i>S. daphnoides</i>                                                              | DA2xDA3_6 | DA     | new cross HU Berlin 2011, G                                                          |
| <i>S. daphnoides</i>                                                              | DA2xDA3_7 | DA     | new cross HU Berlin 2011, G                                                          |
| <i>S. daphnoides</i>                                                              | DA2xDA3_8 | DA     | new cross HU Berlin 2011, G                                                          |
| <i>S. daphnoides</i>                                                              | DA5       | DA     | Poland, Westpommern, Dziwnow                                                         |
| <i>S. purpurea</i>                                                                | PU2       | DA     | G, Baden-Württemberg, Birkenried Pfohren                                             |
| <i>S. daphnoides</i> x <i>S. purpurea</i>                                         | DA5xPU2_1 | ZP     | new cross HU Berlin 2012, G                                                          |
| <i>S. daphnoides</i> x <i>S. purpurea</i>                                         | DA5xPU2_2 | ZP     | new cross HU Berlin 2012, G                                                          |
| <i>S. lasiandra</i>                                                               | LA1       | ZP     | USA, Maryland, National Plant Materials Center Beltsville, Soil Conservation Service |
| <i>S. pentandra</i>                                                               | PE2       | DA     | Austria, Salzburg, Zell am See, Zeller Moos                                          |
| <i>S. pentandra</i> x <i>S. lasiandra</i>                                         | PE2xLA1_1 | DA     | new cross HU Berlin 2014, G                                                          |
| <i>S. pentandra</i> x <i>S. lasiandra</i>                                         | PE2xLA1_2 | DA     | new cross HU Berlin 2014, G                                                          |
| <i>S. pentandra</i> x <i>S. lasiandra</i>                                         | PE2xLA1_3 | DA     | new cross HU Berlin 2014, G                                                          |
| <i>S. alba</i>                                                                    | AL5       | ZP     | G, Mecklenburg-Vorpommern, Schloen                                                   |
| <i>S. pentandra</i> x <i>S. alba</i>                                              | PE2xAL5_1 | DA     | new cross HU Berlin 2013, G                                                          |
| <i>S. pentandra</i> x <i>S. alba</i>                                              | PE2xAL5_2 | DA     | new cross HU Berlin 2013, G                                                          |
| <i>S. pentandra</i> x <i>S. alba</i>                                              | PE2xAL5_3 | DA     | new cross HU Berlin 2013, G                                                          |
| <i>S. pentandra</i> x <i>S. alba</i>                                              | PE2xAL5_4 | DA     | new cross HU Berlin 2013, G                                                          |
| <i>S. daphnoides</i>                                                              | DA6       | DA     | G, Mecklenburg-Vorpommern, Zarrendorf                                                |
| <i>S. purpurea</i>                                                                | PU3       | ZP     | G, Bayern, Miesbach, Aschenbach                                                      |
| <i>S. purpurea</i> x <i>S. daphnoides</i>                                         | PU3xDA6_1 | DA     | new cross Waldsieversdorf 2014, G                                                    |
| <i>S. purpurea</i> x <i>S. daphnoides</i>                                         | PU3xDA6_2 | DA     | new cross Waldsieversdorf 2014, G                                                    |
| <i>S. purpurea</i> x <i>S. daphnoides</i>                                         | PU3xDA6_3 | DA     | new cross Waldsieversdorf 2014, G                                                    |
| <i>S. purpurea</i> x <i>S. daphnoides</i>                                         | PU3xDA6_4 | DA     | new cross Waldsieversdorf 2014, G                                                    |
| <i>S. purpurea</i> x <i>S. daphnoides</i>                                         | PU3xDA6_5 | DA     | new cross Waldsieversdorf 2014, G                                                    |
| <i>S. purpurea</i> x <i>S. viminalis</i> ( <i>schwerinii</i> x <i>viminalis</i> ) | PU3xVI3_1 | ZP     | new cross Waldsieversdorf 2012, G                                                    |
| <i>S. purpurea</i> x <i>S. viminalis</i> ( <i>schwerinii</i> x <i>viminalis</i> ) | PU3xVI3_2 | ZP     | new cross Waldsieversdorf 2012, G                                                    |
| <i>S. purpurea</i> x <i>S. purpurea</i>                                           | PU3xPU2_1 | ZP     | new cross Waldsieversdorf 2012, G                                                    |
| <i>S. purpurea</i> x <i>S. purpurea</i>                                           | PU3xPU2_2 | ZP     | new cross Waldsieversdorf 2012, G                                                    |
| <i>S. purpurea</i> x <i>S. purpurea</i>                                           | PU3xPU2_3 | ZP     | new cross Waldsieversdorf 2012, G                                                    |
| <i>S. purpurea</i>                                                                | PU4       | DA     | G, Bayern, Weilheim-Schongau, Ammer                                                  |
| <i>S. purpurea</i> x <i>S. viminalis</i>                                          | PU4xVI2_1 | DA     | new cross Waldsieversdorf 2011, G                                                    |
| <i>S. purpurea</i> x <i>S. viminalis</i>                                          | PU4xVI2_2 | DA     | new cross Waldsieversdorf 2011, G                                                    |
| <i>S. humboldtiana</i>                                                            | HU1       | WS     | Swedish clone, 'SH2' breeding company Svalöf-Weibull AB                              |
| <i>S. viminalis</i>                                                               | VI6       | WS     | Swedish clone, '78195' breeding company Svalöf-Weibull AB                            |
| <i>S. humboldtiana</i> x <i>S. viminalis</i>                                      | HU1xVI6_1 | ZP     | new cross Waldsieversdorf 2012, G                                                    |
| <i>S. humboldtiana</i> x <i>S. viminalis</i>                                      | HU1xVI6_2 | ZP     | new cross Waldsieversdorf 2012, G                                                    |
| <i>S. purpurea</i>                                                                | PU1       | DA     | G, Bayern, Garmisch-Partenkirchen, Oberau                                            |
| <i>S. humboldtiana</i> x <i>S. purpurea</i>                                       | HU1xPU1_1 | DA     | new cross Waldsieversdorf 2011, G                                                    |
| <i>S. humboldtiana</i> x <i>S. purpurea</i>                                       | HU1xPU1_2 | DA     | new cross Waldsieversdorf 2011, G                                                    |
| <i>S. humboldtiana</i> x <i>S. purpurea</i>                                       | HU1xPU1_3 | DA     | new cross Waldsieversdorf 2011, G                                                    |
| <i>S. nigra</i>                                                                   | SN1       | Garzau | not known                                                                            |
| <i>S. nigra</i> x <i>S. pentandra</i>                                             | SN1xPE1   | ZP     | new cross Waldsieversdorf 2012, G                                                    |

## **Instrumental parameters and workflow of untargeted analysis:**

### **Chromatographic conditions**

Extracts used for the untargeted analysis were produced by extracting 10 mg freeze-dried, powdered willow bark with 500  $\mu\text{L}$  70% methanol (0.1% formic acid) in an ultrasonic bath with ice water for 15 min. After centrifugation (10,000 rpm, 5 min, 20 °C), the supernatant was collected and the pellet was re-extracted with 200  $\mu\text{L}$  of the extraction solution twice. The combined supernatants were filled with ultrapure water up to 1 ml and filtered using SpinX tubes (0.22  $\mu\text{m}$ ). For chemoprofiling of the selected 92 *Salix* bark extracts, UHPLC-ESI-IMS-TOF-MS (Waters, Manchester, UK) data were used to carry out a principal component analysis (PCA). The used Acquity i-class UHPLC system (Waters, Milford, MA, USA) consisted of a sample manager, column oven, and a binary solvent manager (Waters, Milford, MA, USA) coupled with a Vion IMS QTOF mass spectrometer (Waters, Manchester, UK) and operated with the UNIFI v1.8 software (Waters, Milford, MA, USA). Separation was performed on an Acquity UHPLC BEH C18 column (1.7  $\mu\text{m}$ , 130 Å, 2.1 mm x 50 mm, 3/pkg; Waters, Manchester, UK) at a column temperature of 45 °C. The eluents of the mobile phase were A) 0.1% formic acid in ultrapure water and B) 0.1% aqueous formic acid in acetonitrile. The injection volume was 1  $\mu\text{L}$  and the following gradient program was used: 1% B (0 - 1.0 min), 1 - 60% B (1 - 4.5 min), 60 - 80% B (4.5 - 5.5 min), 80 - 100% B (5.5 - 6.0 min), 100% B (6.0 - 7.0 min), 100 - 1% B (7.0 - 7.5 min), 1% B (7.5 - 8.0 min). The analysis of each of the 92 bark extracts (MeOH/0.1% formic acid (70/30, v/v)) was performed with a flow rate of 0.4 mL/min injecting each sample four times (technical replicates). For quality control (QC reference), a pooled sample of all 92 bark extracts, and a blank was injected 20 times and 10 times, respectively, throughout the run time to ensure a consistent analysis. Moreover, the quality control was used for the automatic normalization in the Progenesis QI v2.1 software (Waters, Manchester, UK) and thus error correction of the detected MS signals.

### **MS conditions**

The ion source was operated in the HDMS<sup>e</sup> sensitivity mode via negative electrospray ionization (ESI). The scan time for the HDMS<sup>e</sup> experiment was set to 0.3 s. Following ion source parameters were applied: capillary voltage 2.50 kV, source temperature 150 °C, desolvation temperature 450 °C, cone gas flow 50 L/h, desolvation gas flow 900 L/h.

The collision energy was ramped from 20 to 40 eV. The QTOF system was calibrated from  $m/z$  50 - 1000 using a MajorMix (Waters, Milford, MA, USA) solution. To provide tuning and calibration of the MS system a 50 pg/100  $\mu\text{L}$  solution of pentapeptide leucine enkephalin (Tyr-Gly-Gly-Phe-Leu,  $m/z$  554.2615 [M-H]<sup>-</sup>; Merck KGaA, Darmstadt, Germany) in ACN/0.1% formic acid (1/1, v/v) was used for lock mass correction. This reference solution was infused every 0.5 min with a scan of 2 s.

### **Mass Data Processing and Analysis**

The Progenesis QI v2.1 software was applied for data processing. In total, 396 profile MS<sup>e</sup> raw data were imported and processed automatically. Subsequently, chromatographic peak alignment, experimental design setup, peak picking, deconvolution, compound identification, and compound statistics were executed. Peak picking was employed by following parameters: all runs, automatic limits, default sensitivity, retention time limits (from 0.05 to 7.5 min), and fragment sensitivity (base peak 1%). Of all the analyzed QC references, Progenesis software picked automatically the quality control reference 7 as the most suitable QC sample. This allowed normalization and comparison between groups or *Salix* crosses. Subsequent adduct forms were selected: [M-2H]<sup>-</sup>, [M-H<sub>2</sub>O-H]<sup>-</sup>, [M-H]<sup>-</sup>, [M+FA-H]<sup>-</sup>, [2M-H]<sup>-</sup>, [2M+FA-H]<sup>-</sup>, [2M+HAc-H]<sup>-</sup>, and [3M-H]<sup>-</sup>. Tag filtration was carried out by means of ANOVA  $p$ -value  $\leq 0.05$  and Max-fold change  $\geq 2$  to identify

significant compound differences between the groups. To compare the fragmentation patterns of the analysis, an *in silico* fragment database was created by defining the MetaScope search parameters using an automatic detection format: in-house compound database, auto-detect data format, precursor tolerance of 5 ppm, and theoretical fragmentation with fragment tolerance of 5 ppm as a fragment search method. The statistical analysis including the PCA was employed by means of EZinfo v3.0 (Umetrics, Sweden) conjugated with Progenesis QI using the Pareto scaling model.

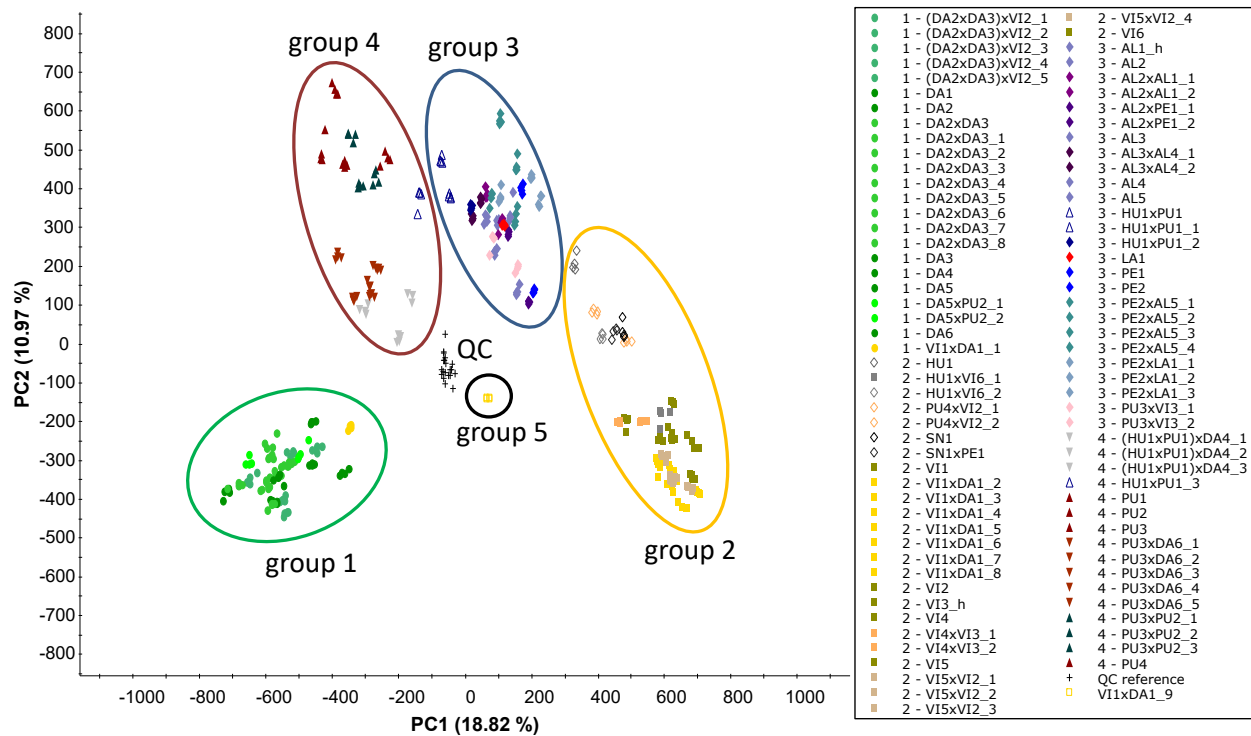

**Supp. Figure: PCA score plot of 92 *Salix* genotypes. According to PCA analysis of untargeted UHPLC-TOF-MS data the different genotypes can be divided into five groups. Different colours and shapes refer to different *Salix* crosses as well as QC reference.**
